# Supplementary material for: In vitro silencing of the insulin receptor attenuates cellular accumulation of fibronectin in renal mesangial cells
Source: PubMed Central journal article supplement (PMC3507851; doi:10.1186/1478-811x-10-29), 2012-10-12

sh-InsR + sh-CREB-1

C 1 2 3 4 5 6 7

CREB-1

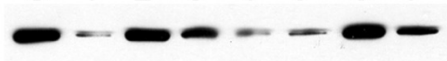

GelCode  
Blue  
Stain

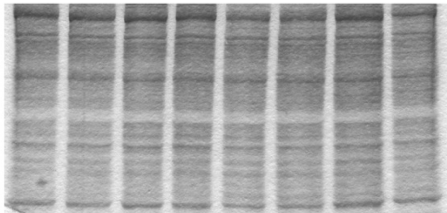

Supplement: 1478-811X-10-29-S4.pdf [file 1478-811X-10-29-S4.pdf]
