# Supplementary material for: In vitro silencing of the insulin receptor attenuates cellular accumulation of fibronectin in renal mesangial cells
Source: PubMed Central journal article supplement (PMC3507851; doi:10.1186/1478-811x-10-29), 2012-10-12
Supplement: 1478-811X-10-29-S5.pdf [file 1478-811X-10-29-S5.pdf]

## PCR primer sequences

| Genes       | Forward primers      | Reverse Primers      |
|-------------|----------------------|----------------------|
| Fibronectin | TGGAGGAGAACCAGGAGAG  | GGTGTTGTAAGGTGGAATGG |
| IGF-1       | ACAGGCTATGGCTCCAGCAT | GCTCCGGAAGCAACACTCAT |
| GAPDH       | TGGCAAAGTGGAGATTGTTG | CTTCTGGGTGGCAGTGATG  |
